# Supplementary material for: Mammalian NSUN2 introduces 5-methylcytidines into mitochondrial tRNAs
Source: bioRxiv or medRxiv preprint supplement (doi:10.1101/624932), 2019-05-02
Supplement: Supplementary file [file media-1.pdf]

## Supplemental information

### **Mammalian NSUN2 introduces 5-methylcytidines to mitochondrial tRNAs**

Saori Shinoda<sup>1,†</sup>, Sho Kitagawa<sup>1,†</sup>, Shinichi Nakagawa<sup>2</sup>, Fan-Yan Wei<sup>3,4</sup>, Kazuhito Tomizawa<sup>3</sup>, Kimi Araki<sup>5</sup>, Masatake Araki<sup>5</sup>, Takeo Suzuki<sup>1,\*</sup>, and Tsutomu Suzuki<sup>1,\*</sup>

<sup>1</sup>Department of Chemistry and Biotechnology, Graduate School of Engineering, the University of Tokyo, 7-3-1 Hongo, Bunkyo-ku, Tokyo 113-8656, Japan,

<sup>2</sup>Faculty of Pharmaceutical Sciences, Hokkaido University, Hokkaido 060-0812, Japan,

<sup>3</sup>Department of Molecular Physiology, Faculty of Life Sciences, Kumamoto University, Kumamoto 860-8556, Japan

<sup>4</sup>Research for Embryonic Science and Technology (PRESTO), Japan Science and Technology Agency (JST), Kawaguchi, Japan

<sup>5</sup>Institute of Resource Development and Analysis, Kumamoto University, Kumamoto 860-0811, Japan

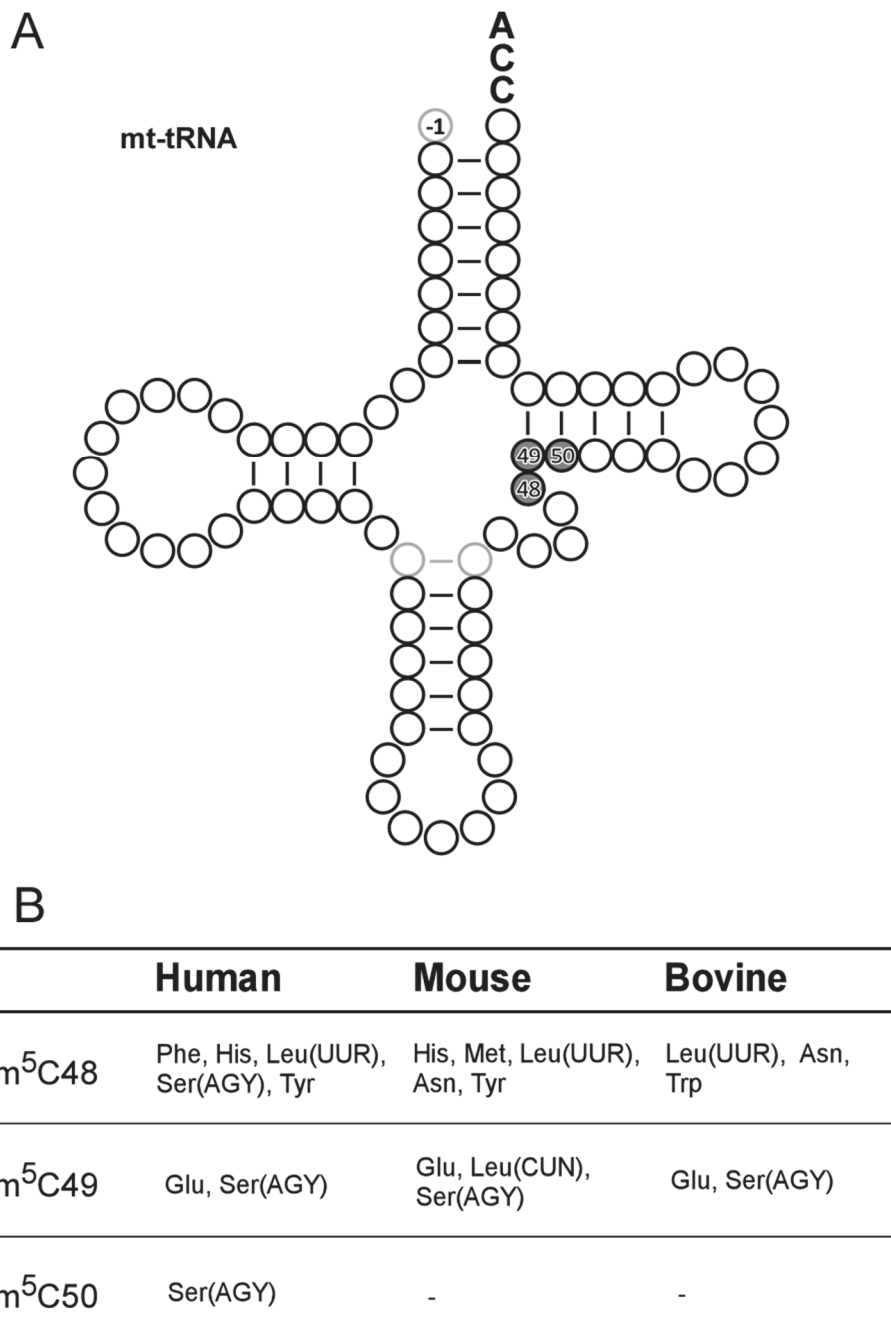

**Figure S1. m<sup>5</sup>C distribution in mt-tRNAs of human, mouse, and cow.**

(A) Secondary structure of mt-tRNAs. Positions of m<sup>5</sup>C modifications are indicated by shaded circles.

(B) tRNA species bearing m<sup>5</sup>C at the corresponding position in three mammals. Bovine mt-tRNA data are from a previous study by our group (5).

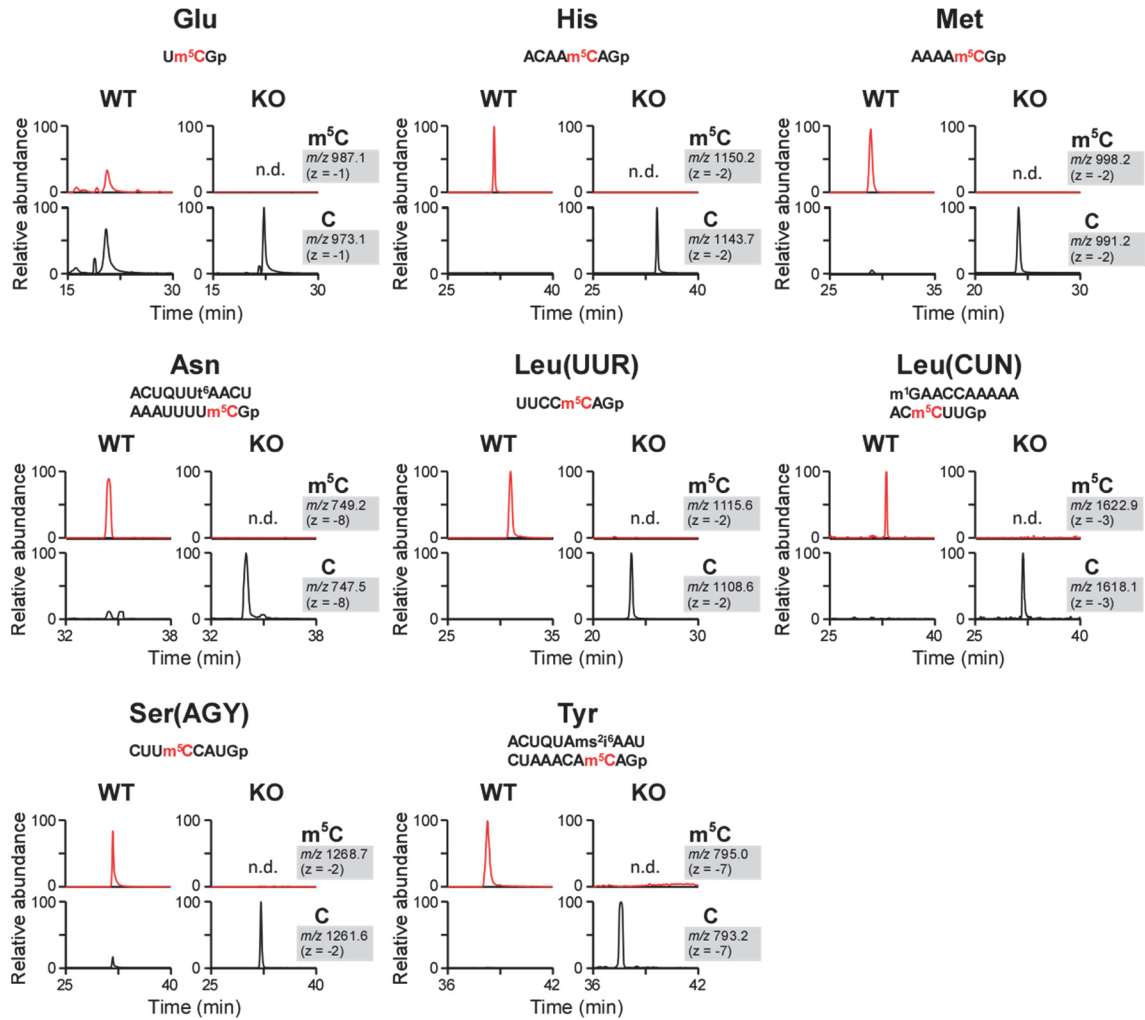

**Figure S2. m<sup>5</sup>C status in eight mt-tRNAs isolated from WT and *Nsun2* KO mouse livers**

XICs of RNase T<sub>1</sub>-digested fragments containing m<sup>5</sup>C (top) and C (bottom) in eight mt-tRNAs isolated from WT and *Nsun2*<sup>-/-</sup> (KO) mouse liver.

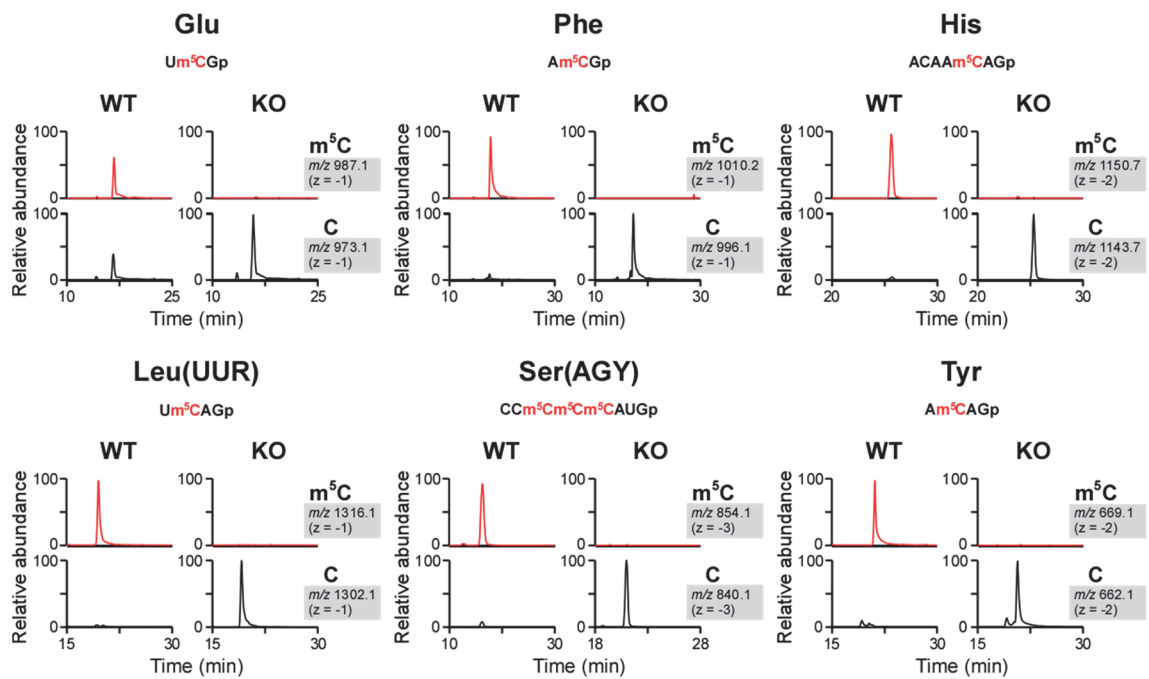

**Figure S3. m<sup>5</sup>C status in six mt-tRNAs isolated from WT and *NSUN2* KO human culture cells.**

XICs of RNase T<sub>1</sub>-digested fragments containing m<sup>5</sup>C (top) and C (bottom) in six mt-tRNAs isolated from WT and *NSUN2* KO HEK293T cells. *m/z* value with the charge state for each fragment is shown to the right of each panel.

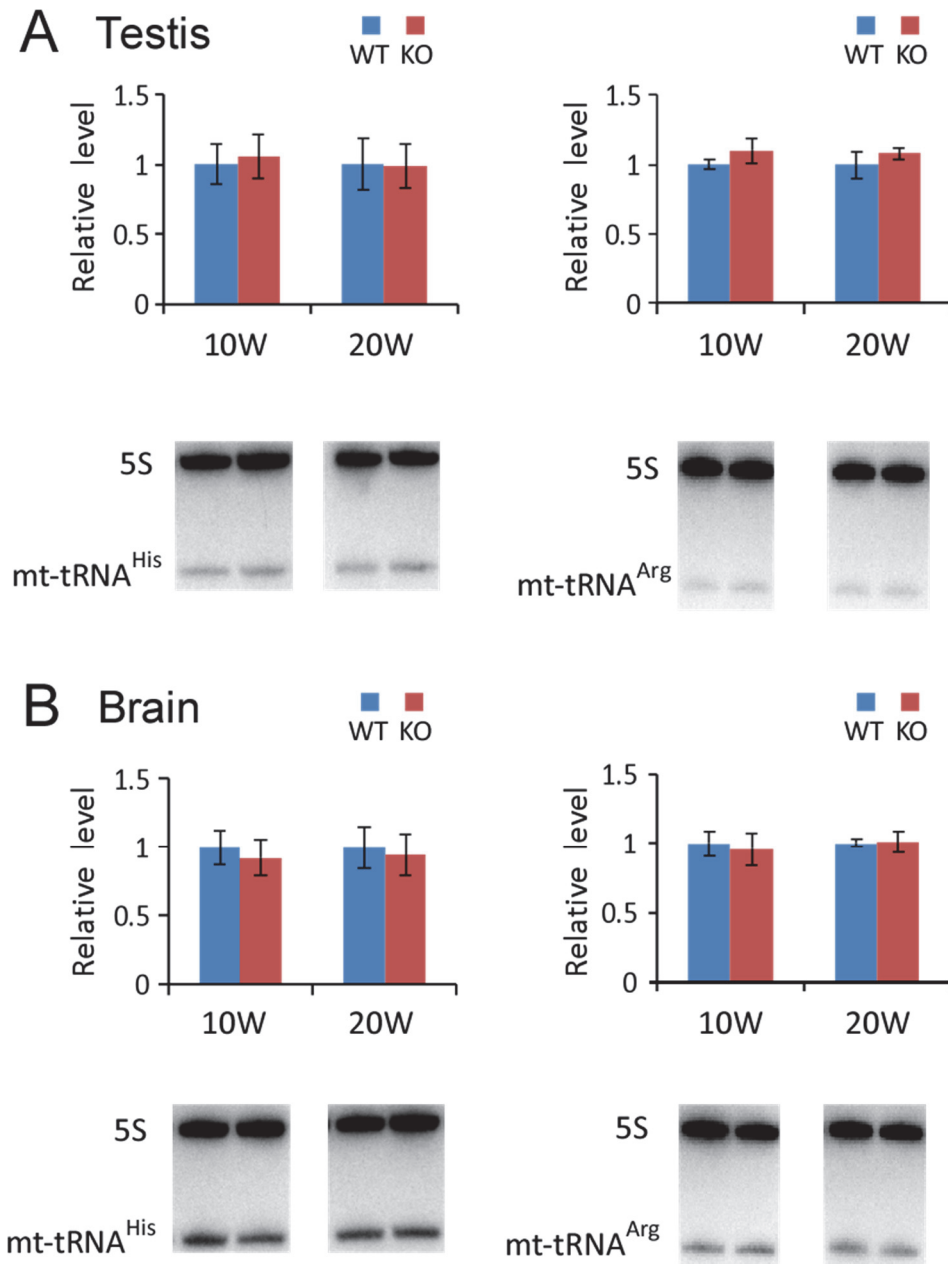

**Figure S4. Northern blotting of mouse mt-tRNAs**

Northern blots of mt-tRNAs for His (left panels) and Arg (right panels) in total RNA isolated from testis (A) and brain (B) of 10- and 20-week-old male mice (WT, blue; *Nsun2*<sup>-/-</sup> (KO), red). Bar graphs represent relative steady-state levels of each tRNA, normalized against 5S rRNA (used as a loading control). Means  $\pm$  S.D. were calculated from three biological replicates.

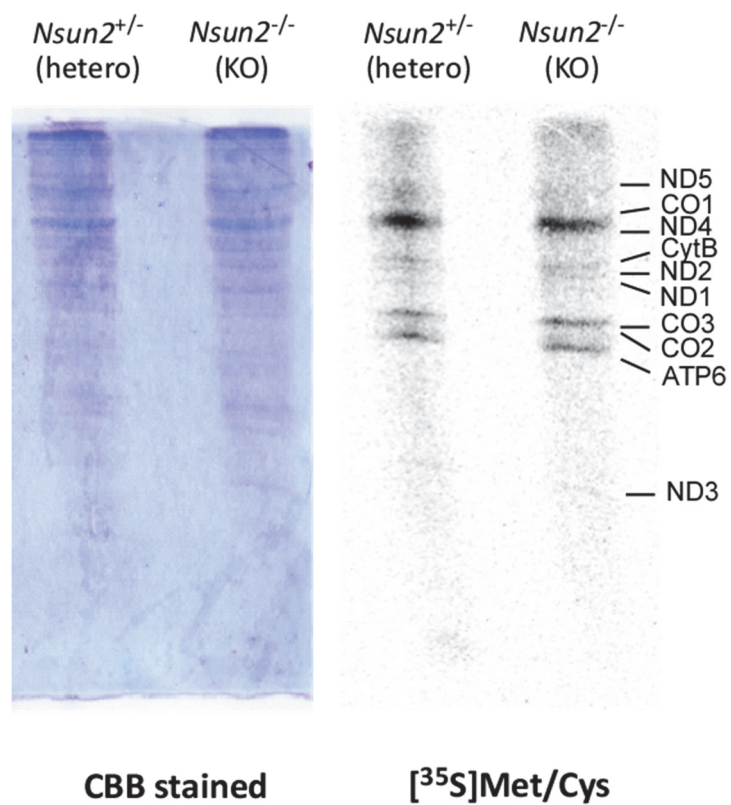

**Figure S5. Pulse labeling of mitochondrial protein synthesis in MEF cells.**

*Nsun2*<sup>+/-</sup> (hetero) and *Nsun2*<sup>-/-</sup> (KO) MEFs were labeled with (<sup>35</sup>S] Met/Cys) and chased for 1 h under emetine treatment (right). Total proteins were visualized by CBB staining (left).

**Table S1 List of primers and probes used in this study**

| Purpose                                          | Name                                    | 5' to 3' sequence                                                 |
|--------------------------------------------------|-----------------------------------------|-------------------------------------------------------------------|
| <b>Inducible mutagenesis with CRISPR/Cas9</b>    |                                         |                                                                   |
| sgRNA for human NSUN2 gene                       | sgRNA_NSUN2_fw                          | CTTAAAGTGGCCGGGAGCG                                               |
|                                                  | sgRNA_NSUN2_rv                          | ATGGCGCCGAGGGTGGTGGAAA                                            |
| Surveyor assay                                   | genome_NSUN2_fw2                        | ACGGTTCTCTGGCACTGTAACAC                                           |
|                                                  | genome_NSUN2_rv2                        | GTGTAGGGCTAGAGTTCTGGC                                             |
| <b>Isolation of mitochondrial tRNA</b>           |                                         |                                                                   |
| For human                                        | RCC_h-mtSer(AGY)                        | TGGTGAGAAAGCCATGTTGTTAGACATGGG                                    |
|                                                  | RCC_h-mtLeu(UUR)                        | TATGCGATTACGGGCTCTGCCATCTTAAC                                     |
|                                                  | RCC_h-mtTyr                             | CAGTCCAATGCTTCACTCAGCCATTTTACC                                    |
|                                                  | RCC_h-mGlu                              | TGGTATTCTCGCACGGACTACAACCACGAC                                    |
|                                                  | RCC_h-mtHis                             | GGTAAATAAGGGGTGTAAGCCTCTGTTGT                                     |
|                                                  | RCC_h-mtPhe                             | TGGTGTTTATGGGGTGATGTGAGCCCGTCT                                    |
| For mouse                                        | RCC_m-mtLeu(UUR)                        | GAGTCTGGCGCCTTAGACCACTCGGCCATCCTGAC                               |
|                                                  | RCC_m-mtAsn                             | TTTAGTTAACAGCTAAATACCCTATTACTGGCTTCAATCT                          |
|                                                  | RCC_m-mGlu                              | ACAGCATTCAACTGCGACCAATGACATGAAAAATCATCGT                          |
|                                                  | RCC_m-mtHis                             | AAGGAGGTTTATTTCTGTTGTGAGATTACAGTCTAATG                            |
|                                                  | RCC_m-mtLeu(CUN)                        | TTGCACCAAGTTTTTGGTTCCTAAGACCAATGGATTACT                           |
|                                                  | RCC_m-mtMet                             | TTCGGGGTATGGGCCGATAGCTTAATTAGCTGAC                                |
|                                                  | RCC_m-mSer(AGY)                         | GCCATGTTTAAACATGGAAGCATGAATTAGCAGTTCTTGC                          |
|                                                  | RCC_m-mtTyr                             | AACCTCTGTGTTTAGATTTACAGTCTAATGCTTACTCAGC                          |
|                                                  | RCC_m-cytoGly                           | GAAGGGAGCTATGCTATGCTCACCCTATACCACCAACGC                           |
|                                                  | RCC_m-cytoLeu(CAA)                      | GAGTCTGGCGCCTTAGACCACTCGGCCATCCTGAC                               |
| <b>PCR primer</b>                                |                                         |                                                                   |
| Template of T7 transcription                     | T7 forward primer                       | GCTAATACGACTCACTATA                                               |
|                                                  | mt tRNA <sup>Ser</sup> (AGY) WT reverse | TGGTAAGAAAGCCATGTTTAAACATGGAAGCATGAATTAGCAGTTCTTGCAATCTTTCTTTATAG |
| RT primer for cloning human NSUN2 gene           | RTcDNANSUN2Rv                           | AGCTTGGCCAAAGAAACAAA                                              |
| Cloning human NSUN2 gene from cDNA by nested PCR | NSUN2_1st_Fw                            | CCCTTAGAGCTGTTGCTGT                                               |
|                                                  | NSUN2_1st_Rv                            | CCAGAAGAAGCCAGTTTTGC                                              |
|                                                  | NSUN2_2nd_Fw                            | CACCATGGGGCGGCGGTCGC                                              |
|                                                  | NSUN2_2nd_Rv                            | CCACCGGGGTGGATGGACC                                               |
| <b>Northern blotting</b>                         |                                         |                                                                   |
|                                                  | NT_MmmtHis_3'                           | TGGGGTGAATAAGGAGGTTTATTTT                                         |
|                                                  | NT_MmmtArg                              | TGGTTGGTAATTATGAACAGCATCATAATC                                    |
|                                                  | NT_MmmtLeu(UUR)                         | GATAGCTTAATTAGCTGACCTTACT                                         |
|                                                  | NT_MmmtSerAGY_5'                        | CATGAATTAGCAGTTCTTGCAATCTTTCTT                                    |
|                                                  | NT_Mmcyto_Gly_GCC                       | TCTACCACTGAACCACCCAT                                              |
|                                                  | NT_Mmcyto_Arg_ACG                       | TGGCGAGCCAGCCAGGAGTCGAACCTGGAA                                    |
|                                                  | NT_Mm_5S_rRNA                           | GGGTGGTATGGCCGTAGAC                                               |
